# Supplementary material for: Combination of Erlotinib and Naproxen Employing Pulsatile or Intermittent Dosing Profoundly Inhibits Urinary Bladder Cancers
Source: Oxford University Press journal article supplement (doi:10.1158/1940-6207.capr-19-0339), 2019-12-09
Supplement: 19406207capr190339-sup-225288_2_supp_5917620_q1dk3d.docx [file 19406207capr190339-sup-225288_2_supp_5917620_q1dk3d.docx]

**Supplementary Figure Legends**

**Supplementary Figure 1. Body weights of rats treated with OH-BBN and erlotinib and/or naproxen. A.** Body weight graph of rats receiving erlotinib and/or naproxen one week post final carcinogen treatment during the chemoprevention study. **B.** Body weight graph of rats receiving erlotinib and/or naproxen three months post final carcinogen treatment during the chemoprevention study. C. Body weight graph of rats receiving erlotinib and/or naproxen one month post final carcinogen treatment during the chemoprevention study.

**Supplementary Figure 2. Effect of erlotinib and/or naproxen on biomarker expressions.** Expression of cell proliferation (ki67) **(A)**, pSTAT3 **(B),** pP38 **(C)**, Cyclin D1 **(D),** pERK **(E),** and IL1β **(F)** in urinary bladder transitional cell cancers induced in female fischer-344 rats with hydroxy butyl (butyl) nitrosamine
